# Supplementary material for: Stepwise transition from the Eocene greenhouse to the Oligocene icehouse
Source: Springer Nature journal article supplement (doi:10.1038/ngeo179), 2008-04-13

## Supplementary documents

### Age models

We compare  $\delta^{18}\text{O}_{\text{bf}}$  records across the Eocene-Oligocene transition from Atlantic Ocean Site 522, Pacific Ocean Site 1218, and Gulf of Mexico SSQ. We use Site 522 as the standard because it has the firmest paleomagnetic age control, and we correlate the other records to this standard. We use three paleomagnetic datums at Site 522 to constrain our age models: 1) the top of Chronozone C15n (34.669 Ma, 148.88 meters below sea floor (mbsf)); 2) the base of Chronozone C13n (33.545 Ma, 133.65 mbsf); and 3) the top of Chronozone C13n (33.05 Ma, 128.54 mbsf)<sup>1</sup>. The time scale of Berggren and colleagues is used<sup>2</sup>.

The  $\delta^{18}\text{O}_{\text{bf}}$  increase that defines Oi-1 (earliest Oligocene) has been constrained paleomagnetically to the Chron C13r/C13n transition at Site 522, which has been confirmed at Indian Ocean Site 744<sup>1</sup>. The maximum  $\delta^{18}\text{O}_{\text{bf}}$  value at Site 522 lies in the first normal polarity point (133.65 mbsf, C13n) above a reversed polarity point (134.05 mbsf, C13r). At SSQ, the maximum  $\delta^{18}\text{O}_{\text{bf}}$  value of Oi-1 appears to occur in highest C13r. A 40 cm coring gap at Site 522 between the uppermost C13r and lowermost C13n samples allows us to reconcile the Site 522 and SSQ records, and we align the maximum  $\delta^{18}\text{O}_{\text{bf}}$  value of Oi-1 at the C13n/C13r boundary.

The placement of Oi-1 relative to magnetostratigraphy is uncertain at Site 1218. Lanci and colleagues<sup>3</sup> did not report polarity data below 220 meters core depth (mcd) at Site 1218 (mid-C12r). The polarity history is quite clear at nearby Site 1219<sup>3</sup>. Carbonate data were used to correlate Site 1218 to Site 1219, and then to suggest that the lower boundary of Chron C13n at Site 1218 may be at 240.29 mcd<sup>4</sup>. However, this would place the Oi-1  $\delta^{18}\text{O}_{\text{bf}}$  maximum (239.51 mcd) almost 1 m above the base of Chron C13n, which is inconsistent with Site 522 and SSQ, both of which have good paleomagnetic data measured on the cores, rather than extrapolated from nearby locations (as is the case with Site 1218).

Based on this inconsistency, we revisited the correlations between Sites 1218 and 1219. Physical property data ("L\* data", which is a sediment color measurement that reflects carbonate content) were collected at Sites 1218 and 1219<sup>5</sup>. The L\* data for Sites 1218 and 1219 are very different in the uppermost Eocene sediments. The polarity change (C13n) at 176.3 mcd measured at Site 1219 is coincident with a sharp change in sediment color (L\* increases from 30 to 60 in < 30 cm). In contrast, the L\* record from Hole 1218C shows an intermediate phase from 242 to 240 mcd. At Holes 1218A and 1218B, the L\* maximum is at 237 mcd, but both have significant core missing in this section. Because the correlations between Sites 1218 and 1219 are ambiguous at the C13n/C13r transition, we use the maximum  $\delta^{18}\text{O}_{\text{bf}}$  value of Oi-1 to correlate Site 1218 to Site 522.

Within the constraints of the paleomagnetic datums at Site 522 (above), we correlate our Site 1218 and SSQ age models to

Site 522 using  $\delta^{13}\text{C}$  stratigraphy (Supplementary Figure 1, Supplementary Table 1).

Supplementary Table 1. **Depths and ages used as correlation points in age models for each core.** Correlation pairs with no reference cited were established as part of this study.

| Correlation point | Age (Ma) | 522 depth (mbsf)    | 1218 depth (mcd)    | SSQ depth (m)        |
|-------------------|----------|---------------------|---------------------|----------------------|
| top C13n          | 33.05    | 128.54 <sup>1</sup> | 233.88 <sup>3</sup> | 40.55 <sup>7,8</sup> |
| base              |          |                     |                     |                      |
| C13n              | 33.545   | 133.65 <sup>1</sup> |                     |                      |
| Oi-1              | 33.545   | 133.65              | 239.51              | 46.59                |
| SB                | 33.59    |                     |                     | 46.98                |
| SB                | 33.62    |                     |                     | 46.98                |
| Ci-3              | 33.809   | 138.31              | 241.91              | 48.78                |
| Ci-2              | 33.979   | 139.53              | 243.13              | 50.03                |
| Ci-1              | 34.115   | 141.38              | 244.35              |                      |
| top C15n          | 34.669   | 148.88 <sup>1</sup> |                     |                      |

SB = sequence boundary

Ci = carbon isotope

Supplementary Table 2. **Stable isotopic ( $\delta^{18}\text{O}$ ,  $\delta^{13}\text{C}$ ) and trace element (Mg/Ca) data from St. Stephens Quarry.**

Supplementary Figure 1. **Comparisons of  $\delta^{13}\text{C}$  from Site 1218<sup>6</sup>, Site 522<sup>1</sup>, and SSQ (this study).** We correlate our Site 1218 and SSQ age models to Site 522 using  $\delta^{13}\text{C}$  stratigraphy within the constraints of the paleomagnetic datums at Site 522 (Supplementary Table 1).

1. Zachos, J. C., Quinn, T. M. & Salamy, S. High resolution ( $10^4$  yr) deep-sea foraminiferal stable isotope records of the earliest Oligocene climate transition. *Paleoceanography* **9**, 353-387 (1996).
2. Berggren, W. A., Kent, D. V., Swisher, C. C. & Aubry, M.-P. in *Geochronology, Time Scales and Global Stratigraphic Correlations: A Unified Temporal Framework for an Historical Geology* (eds. Berggren, W. A., Kent, D. V. & Hardenbol, J.) 129-212 (SEPM (Society for Sedimentary Geology), Tulsa OK, 1995).
3. Lanci, L., Pares, J. M., Channell, J. E. T. & Kent, D. V. Oligocene magnetostratigraphy from Equatorial Pacific Sediments (ODP Sites 1218 and 1219, Leg 199). *Earth and Planetary Science Letters* **237**, 617-634 (2005).
4. Pälike, H. et al. The heartbeat of the Oligocene climate system. *Nature* **314**, 1894-1898 (2006).
5. Shipboard Scientific Party. in *Proceedings of the Ocean Drilling Program, Initial Reports* (eds. Bralower, T., Premoli-Silva, I. & Malone, M.) (College Station, TX, 2002).

6. Coxall, H. K., Wilson, P. A., Palike, H., Lear, C. H. & Backman, J. Rapid stepwise onset of Antarctic glaciation and deeper calcite compensation in the Pacific Ocean. *Nature* **433**, 53-57 (2005).
7. Miller, K. G., Thompson, P. R. & Kent, D. V. Integrated stratigraphy of the Alabama coastal plain: Relationship of upper Eocene to Oligocene unconformities to glacioeustatic change. *Paleoceanography* **8**, 313-331 (1993).
8. Miller, K. G. et al. Eocene-Oligocene Global Climate and Sea-level Changes: St. Stephens Quarry, Alabama. *GSA Bulletin* **12**, 34–53 (2008).

Katz SuppTable2

| depth<br>(m) | Age (Ma) | C13<br>PDB | O18<br>PDB | C13<br>(avg) | O18<br>(avg) | species       | isotope<br>reference | Mg/Ca | seafloor<br>temp. | seafloor<br>temp. (avg) | Species      | del w |
|--------------|----------|------------|------------|--------------|--------------|---------------|----------------------|-------|-------------------|-------------------------|--------------|-------|
| 22.26        | 32.0183  | 0.50       | -0.26      | 0.375        | -0.290       | C. cocoaensis | this study           | 5.574 | 17.070            | 17.070                  | 16C.spp.     | 0.299 |
| 22.26        | 32.0183  | 0.25       | -0.32      |              |              | Cib. spp.     | this study           |       |                   |                         | +17C.pippeni |       |
| 22.87        | 32.0527  | 0.59       | -0.43      | 0.570        | -0.550       | C pippeni     | this study           | 6.788 | 18.880            | 18.880                  | C.pippeni    | 0.447 |
| 22.87        | 32.0527  | 0.55       | -0.68      |              |              | Cib. spp.     | Miller et al. 2008   |       |                   |                         |              |       |
| 25.55        | 32.2040  | 0.62       | -0.27      | 0.505        | -0.285       | C pippeni     | this study           | 6.961 | 19.110            | 19.110                  | C.pippeni    | 0.764 |
| 25.55        | 32.2040  | 0.39       | -0.30      |              |              | Cib. spp.     | Miller et al. 2008   |       |                   |                         |              |       |
| 28.05        | 32.3450  | 0.47       | -0.49      | 0.410        | -0.485       | C pippeni     | this study           | 6.630 | 18.660            | 18.660                  | C.pippeni    | 0.463 |
| 28.05        | 32.3450  | 0.35       | -0.48      |              |              | Cib. spp.     | Miller et al. 2008   |       |                   |                         |              |       |
| 29.27        | 32.4137  | 0.80       | -0.13      | 0.570        | -0.295       | C pippeni     | this study           | 6.560 | 18.570            | 18.570                  | C.pippeni    | 0.633 |
| 29.27        | 32.4137  | 0.34       | -0.46      |              |              | Cib. spp.     | Miller et al. 2008   |       |                   |                         |              |       |
| 33.72        | 32.6648  | 0.76       | -0.24      | 0.760        | -0.260       | C pippeni     | this study           | 6.222 | 18.080            | 18.080                  | C.pippeni    | 0.558 |
| 33.72        | 32.6648  | 0.76       | -0.28      |              |              | Cib. spp.     | Miller et al. 2008   |       |                   |                         |              |       |
| 35.98        | 32.7920  | 0.64       | -0.33      | 0.615        | -0.335       | C pippeni     | this study           | 6.503 | 18.490            | 18.490                  | C.pippeni    | 0.575 |
| 35.98        | 32.7920  | 0.59       | -0.34      |              |              | Cib. spp.     | Miller et al. 2008   |       |                   |                         |              |       |
| 37.32        | 32.8677  | 0.88       | -0.37      | 0.775        | -0.465       | C pippeni     | this study           | 5.892 | 17.580            | 17.580                  | C.pippeni    | 0.240 |
| 37.32        | 32.8677  | 0.67       | -0.56      |              |              | Cib. spp.     | Miller et al. 2008   |       |                   |                         |              |       |
| 38.54        | 32.9364  | 0.46       | -0.58      | 0.730        | -0.410       | C pippeni     | this study           | 5.872 | 17.550            | 17.550                  | C.pippeni    | 0.288 |
| 38.54        | 32.9364  | 1.00       | -0.24      |              |              | Cib. spp.     | Miller et al. 2008   |       |                   |                         |              |       |
| 39.33        | 32.9812  | 0.39       | -0.54      | 0.290        | -0.490       | C pippeni     | this study           | 6.221 | 18.080            | 18.080                  | C.pippeni    | 0.328 |
| 39.33        | 32.9812  | 0.19       | -0.44      |              |              | Cib. spp.     | Miller et al. 2008   |       |                   |                         |              |       |
| 40.46        | 33.0448  | 1.70       | 0.47       | 1.700        | 0.470        | C pippeni     | this study           | 5.569 | 17.060            | 17.060                  | C.pippeni    | 1.056 |
| 40.64        | 33.0574  | 0.56       | 0.12       | 0.560        | 0.120        | C pippeni     | this study           |       |                   |                         |              |       |
| 40.79        | 33.0699  | 0.73       | -0.23      | 0.850        | -0.225       | C pippeni     | this study           |       |                   |                         |              |       |
| 40.79        | 33.0699  | 0.97       | -0.22      |              |              | Cib. spp.     | Miller et al. 2008   |       |                   |                         |              |       |
| 41.16        | 33.0999  | 0.55       | -0.55      | 0.550        | -0.550       | Cib. spp.     | this study           |       |                   |                         |              |       |
| 42.38        | 33.1998  | 0.63       | -0.05      | 0.815        | -0.125       | C pippeni     | this study           |       |                   |                         |              |       |
| 42.38        | 33.1998  | 1.00       | -0.20      |              |              | Cib. spp.     | Miller et al. 2008   |       |                   |                         |              |       |
| 43.29        | 33.2748  | 1.41       | 0.14       | 1.410        | 0.140        | Cib. spp.     | Miller et al. 2008   |       |                   |                         |              |       |
| 43.60        | 33.2998  | 1.33       | -0.11      | 1.330        | -0.110       | Cib. spp.     | Miller et al. 2008   |       |                   |                         |              |       |
| 44.21        | 33.3497  | 1.46       | -0.11      | 1.315        | -0.035       | C pippeni     | this study           | 7.410 | 19.680            | 19.473                  | C.pippeni    |       |
| 44.21        | 33.3497  | 1.17       | 0.04       |              |              | Cib. spp.     | Miller et al. 2008   | 7.081 | 19.267            |                         | C.pippeni    | 1.095 |
| 44.97        | 33.4122  | 1.47       | -0.15      | 1.470        | -0.150       | Cib. spp.     | Miller et al. 2008   | 7.383 | 19.650            | 19.650                  | C.pippeni    | 1.019 |
| 45.79        | 33.4797  | 1.72       | -0.01      | 1.720        | -0.010       | Cib. spp.     | Miller et al. 2008   | 6.643 | 18.681            | 18.681                  | C.pippeni    | 0.943 |
| 46.13        | 33.5071  |            |            |              |              |               |                      | 6.741 | 18.816            | 18.816                  | C.pippeni    | 1.022 |
| 46.13        | 33.5071  | 1.29       | 0.04       | 1.294        | 0.038        | Cib. spp.     | this study           |       |                   |                         |              |       |
| 46.25        | 33.5171  | 2.17       | 0.74       | 2.170        | 0.740        | C pippeni     | this study           | 5.490 | 16.930            | 17.117                  | C.pippeni    | 1.340 |

|       |         |       |       |       |        |               |                    |       |        |        |               |           |       |
|-------|---------|-------|-------|-------|--------|---------------|--------------------|-------|--------|--------|---------------|-----------|-------|
| 46.25 | 33.5171 |       |       |       |        |               |                    |       | 5.717  | 17.304 |               | C.pippeni |       |
| 46.28 | 33.5196 | 1.98  | 0.63  | 1.980 | 0.630  | C pippeni     | this study         |       | 6.021  | 17.780 | 17.969        | C.pippeni | 1.423 |
| 46.28 | 33.5196 |       |       |       |        |               |                    |       | 6.274  | 18.158 |               | C.pippeni |       |
| 46.37 | 33.5271 | 1.97  | 0.20  | 1.870 | 0.115  | C pippeni     | this study         |       | 4.802  | 15.700 | 15.800        | C.pippeni |       |
| 46.37 | 33.5271 | 2.15  | 0.03  |       |        | C pippeni     | this study         |       | 4.906  | 15.900 |               | C.pippeni |       |
| 46.37 | 33.5271 | 1.49  | 0.15  |       |        | Cib. spp.     | Miller et al. 2008 |       |        |        |               |           |       |
| 46.59 | 33.5446 | 2.18  | 0.94  | 2.305 | 0.875  | C. pippeni    | this study         |       | 5.161  | 16.370 | 16.827        | C.pippeni | 1.408 |
| 46.59 | 33.5446 | 2.43  | 0.81  |       |        | C pippeni     | this study         |       | 5.704  | 17.284 |               | C.pippeni |       |
| 46.65 | 33.5515 | 1.53  | -0.04 | 1.530 | -0.040 | C pippeni     | this study         |       | 6.086  | 17.880 | 17.862        | C.pippeni | 0.843 |
| 46.65 | 33.5515 |       |       |       |        |               |                    |       | 6.063  | 17.843 |               | C.pippeni |       |
| 46.65 | 33.5524 | 1.90  | 0.19  | 1.900 | 0.190  | C pippeni     | this study         |       | 6.051  | 17.826 | 17.826        | C.pippeni |       |
| 46.77 | 33.5656 | 1.47  | 0.29  | 1.467 | 0.293  | Cib. spp.     | this study         |       |        |        |               |           |       |
| 46.97 | 33.5884 | 1.85  | 0.27  | 1.850 | 0.270  | C pippeni     | this study         |       |        |        |               |           |       |
| 47.06 | 33.6282 | 0.31  | 0.02  | 0.310 | 0.020  | C pippeni     | this study         |       |        |        |               |           |       |
| 47.41 | 33.6282 | 1.54  | 0.22  | 1.540 | 0.220  | C pippeni     | this study         |       |        |        |               |           |       |
| 47.44 | 33.6682 | 0.07  | -0.60 | 0.070 | -0.600 | Cib. spp.     | Miller et al. 2008 |       |        |        |               |           |       |
| 47.53 | 33.6778 | 0.01  | -0.67 | 0.000 | -0.595 | C. cocoaensis | this study         |       |        |        |               |           |       |
| 47.53 | 33.6778 | -0.01 | -0.52 |       |        | C. pippeni    | this study         |       |        |        |               |           |       |
| 47.68 | 33.6938 | 1.47  | 0.15  | 1.470 | 0.150  | Cib. spp.     | this study         |       |        |        |               |           |       |
| 47.77 | 33.7034 | 0.42  | -0.45 | 0.430 | -0.415 | C. cocoaensis | this study         |       |        |        |               |           |       |
| 47.77 | 33.7034 | 0.44  | -0.38 |       |        | C. pippeni    | this study         |       |        |        |               |           |       |
| 47.93 | 33.7194 | 0.38  | -0.37 | 0.375 | -0.295 | Cib. spp.     | this study         |       |        |        |               |           |       |
| 47.93 | 33.7194 | 0.37  | -0.22 |       |        | C. pippeni    | this study         |       |        |        |               |           |       |
| 48.17 | 33.7450 | 0.37  | -0.44 | 0.450 | -0.400 | C pippeni     | this study         |       |        |        |               |           |       |
| 48.17 | 33.7450 | 0.53  | -0.36 |       |        | Cib. spp.     | Miller et al. 2008 |       |        |        |               |           |       |
| 48.20 | 33.7482 | 0.38  | -0.31 | 0.380 | -0.307 | Cib. spp.     | this study         |       |        |        |               |           |       |
| 48.26 | 33.7546 | 0.33  | -0.31 | 0.328 | -0.314 | Cib. spp.     | this study         |       |        |        |               |           |       |
| 48.32 | 33.7610 | 1.29  | -0.08 | 1.290 | -0.080 | C pippeni     | this study         |       |        |        |               |           |       |
| 48.48 | 33.7770 | 0.30  | -0.45 | 0.298 | -0.446 | Cib. spp.     | this study         |       |        |        |               |           |       |
| 48.69 | 33.7994 | 0.72  | -0.20 | 0.722 | -0.196 | Cib. spp.     | this study         | 5.392 | 16.767 | 16.767 | C.pippeni     | 0.324     |       |
| 48.78 | 33.8091 | 1.20  | 0.00  | 1.200 | 0.000  | C pippeni     | this study         | 4.935 | 15.950 | 15.950 | C.pippeni     | 0.332     |       |
| 48.87 | 33.8215 | 0.73  | -0.17 | 0.625 | -0.350 | C pippeni     | this study         | 4.995 | 16.070 | 16.070 | C.pippeni     | 0.010     |       |
| 48.87 | 33.8215 | 0.52  | -0.53 |       |        | Cib. spp.     | Miller et al. 2008 |       |        |        |               |           |       |
| 48.90 | 33.8257 | 0.76  | -0.10 | 0.760 | -0.100 | C pippeni     | this study         | 4.920 | 15.927 | 15.927 | C.pippeni     | 0.227     |       |
| 49.05 | 33.8464 | 0.72  | -0.35 | 0.720 | -0.350 | C pippeni     | this study         |       |        |        |               |           |       |
| 49.36 | 33.8878 | 0.48  | -0.24 | 0.480 | -0.240 | C. cocoaensis | this study         |       |        |        |               |           |       |
| 49.39 | 33.8920 | 0.59  | -0.56 | 0.215 | -0.425 | C pippeni     | this study         | 4.844 | 15.784 | 15.784 | C.pippeni     | -0.131    |       |
| 49.39 | 33.8920 | -0.16 | -0.29 |       |        | Cib. spp.     | Miller et al. 2008 |       |        |        |               |           |       |
| 49.45 | 33.9003 | 0.34  | -0.44 | 0.340 | -0.440 | C. cocoaensis | this study         | 5.330 | 16.067 | 16.364 | C. cocoaensis | -0.013    |       |

|       |         |       |       |        |        |               |                    |  |       |        |        |               |        |
|-------|---------|-------|-------|--------|--------|---------------|--------------------|--|-------|--------|--------|---------------|--------|
| 49.45 | 33.9003 |       |       |        |        |               |                    |  | 4.996 | 16.660 |        | C.pippeni     |        |
| 49.66 | 33.9293 | -0.02 | -0.65 | -0.020 | -0.650 | C. cocoaensis | this study         |  | 6.258 | 18.130 | 18.130 | C. cocoaensis | 0.179  |
| 49.70 | 33.9335 | -0.05 | -0.88 | -0.015 | -0.895 | C. cocoaensis | this study         |  | 6.048 | 17.820 | 17.820 | C. cocoaensis | -0.136 |
| 49.70 | 33.9335 | 0.02  | -0.91 |        |        | Cib. spp.     | Miller et al. 2008 |  |       |        |        |               |        |
| 50.03 | 33.9791 | 0.13  | -0.40 | -0.095 | -0.725 | C. cocoaensis | this study         |  | 7.222 | 19.450 | 19.450 | C. cocoaensis | 0.400  |
| 50.03 | 33.9791 | -0.32 | -1.05 |        |        | Cib. spp.     | Miller et al. 2008 |  |       |        |        |               |        |
| 50.18 | 33.9998 | 0.07  | -0.61 | 0.070  | -0.610 | C. cocoaensis | this study         |  | 6.979 | 19.130 | 19.130 | C. cocoaensis | 0.443  |
| 50.34 | 34.0205 | 0.28  | -0.74 | 0.280  | -0.740 | C. cocoaensis | this study         |  | 8.403 | 20.840 | 20.840 | C. cocoaensis | 0.692  |

\*The SSQ core was sampled multiple times over several years. Hence, the exact core depth of this sample is uncertain relative to those immediately above and below. It is plotted, but not connected by the line.

Miller, K. G. et al. Eocene-Oligocene Global Climate and Sea-level Changes: St. Stephens Quarry, Alabama. GSA Bulletin 12, 34-53 (2008).

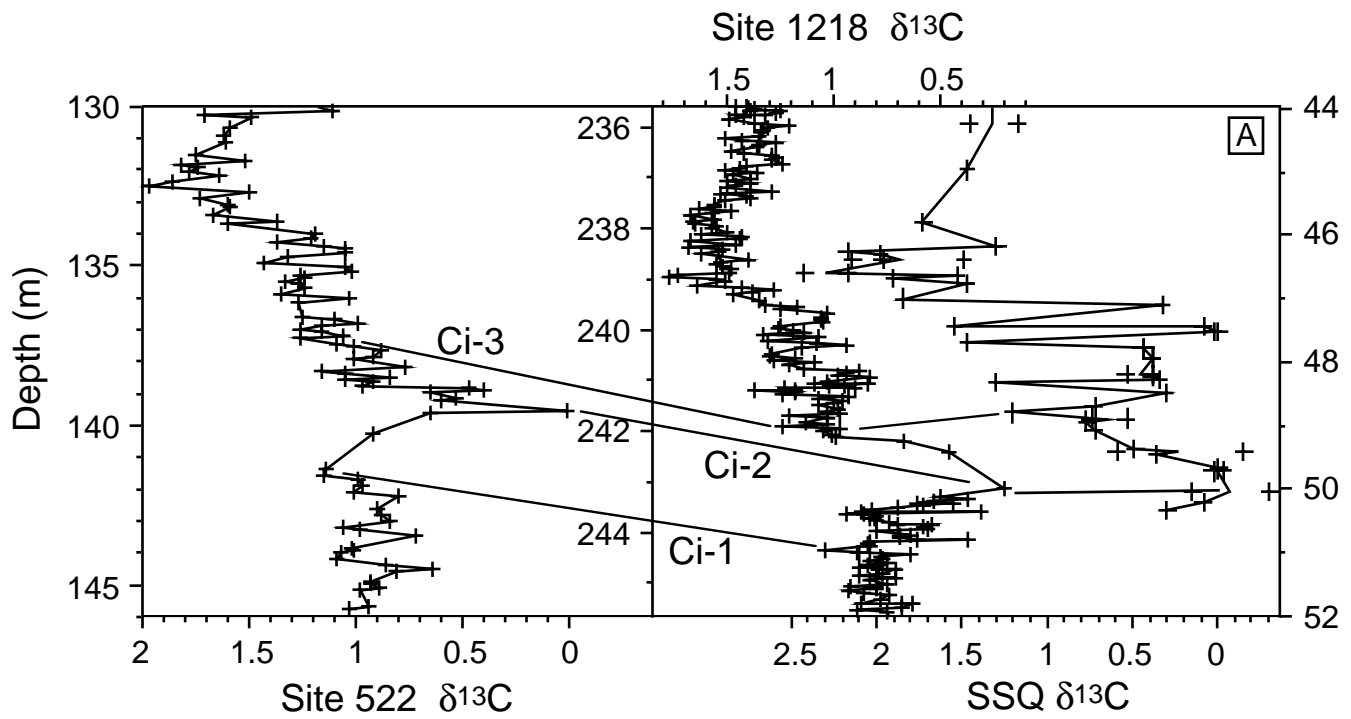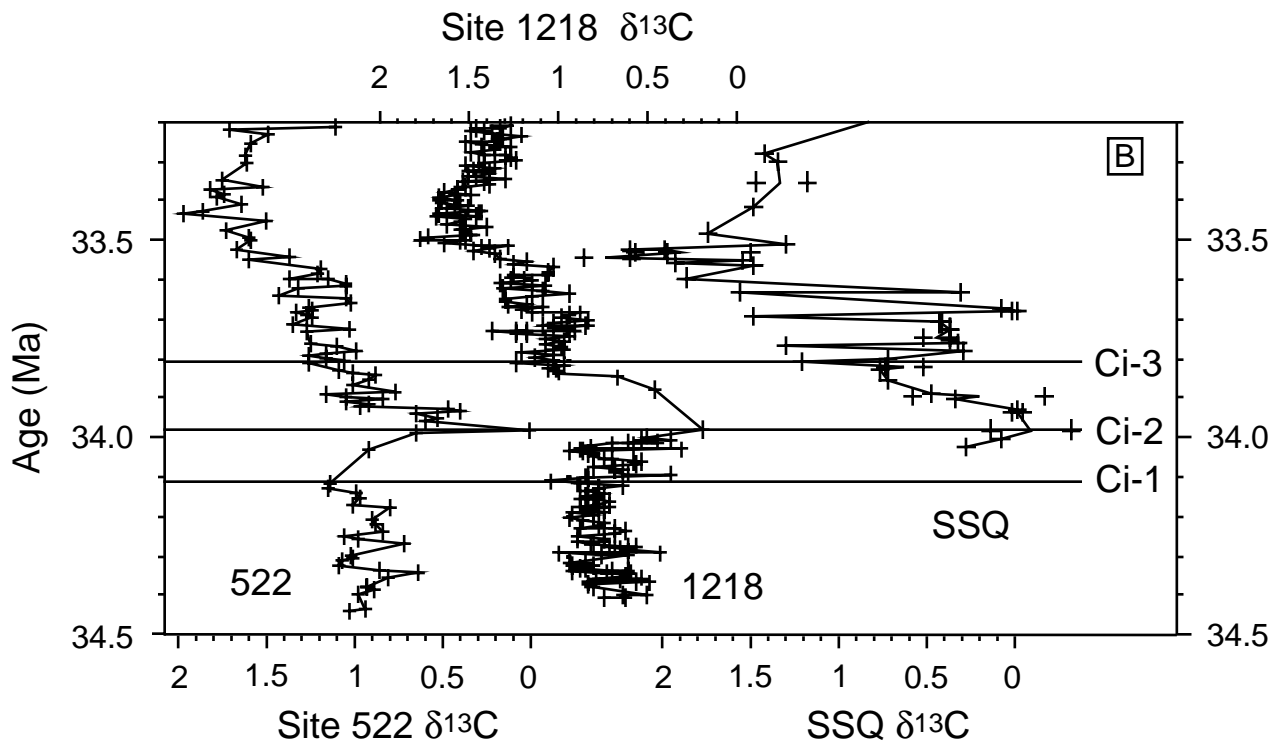

Supplement: 41561_2008_BFngeo179_MOESM286_ESM.pdf [file 41561_2008_BFngeo179_MOESM286_ESM.pdf]
